# Supplementary material for: The Effects of Planetary Boundary Layer Features on Air Pollution Based on ERA5 Data in East China
Source: MDPI journal article supplement (doi:10.3390/atmos14081273), 2023-08-11
Supplement: s1 [file s1]

# Supplementary Materials: The effects of planetary boundary layer features on air pollution based on ERA5 data in East China

Xueliang Deng<sup>1</sup>, Jian Chen<sup>1</sup>, Rui Dai<sup>1</sup>, Zhenfang Zhai<sup>1</sup>, Dongyan He<sup>2,\*</sup>, Liang Zhao<sup>3</sup>, Xiaolong Jin<sup>1</sup> and Jiping Zhang<sup>3</sup>

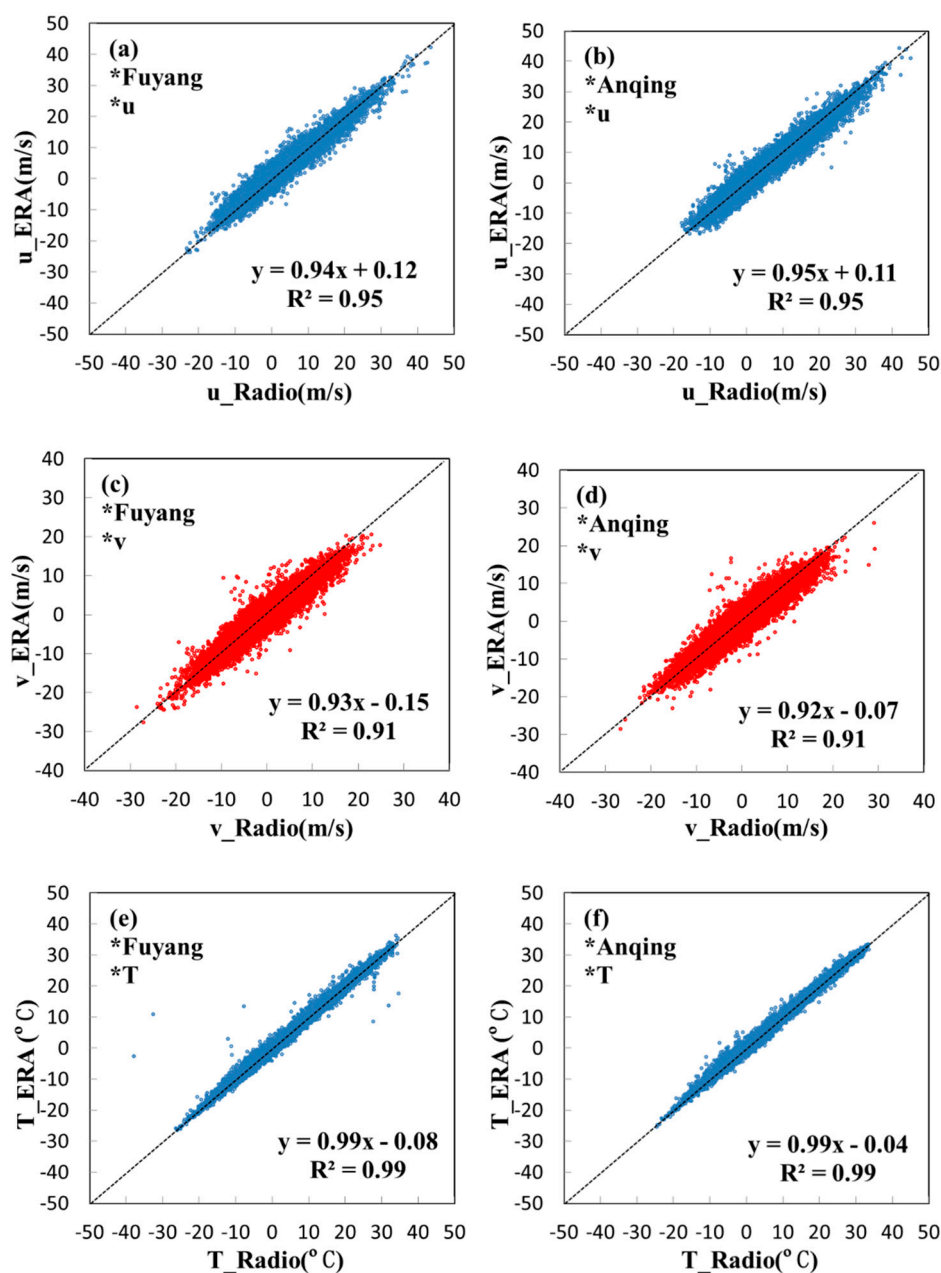

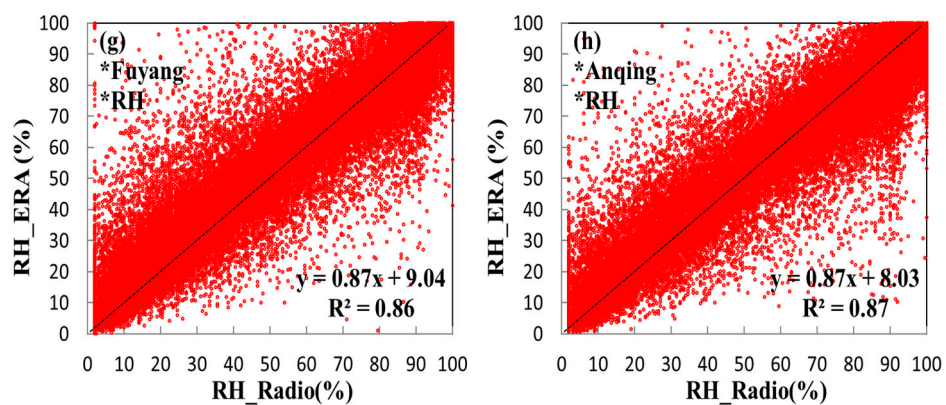

**Figure S1.** Scatterplots of u component (a, b), v component (c, d), temperature (e, f), and relative humidity (g, h) between radiosonde data and ERA5 data from 2018 to 2021 in Fuyang (left) and Anqing (right).
